# Supplementary material for: Fast and sensitive visual detection of Fe 2+ using silver nanoparticles modified with 3,3′,5,5′-tetramethylbenzidine and 3-mercaptopropionic acid
Source: Royal Society of Chemistry journal article supplement (doi:10.1039/d5ay01547b), 2025-01-01
Supplement: d5ay01547b1.pdf [file d5ay01547b1.pdf]

**Fast and sensitive visual detection of Fe<sup>2+</sup> using silver nanoparticles  
modified by 3,3',5,5'-tetramethylbenzidine and 3-mercaptopropionic  
acid**

Qian Wang<sup>a,1</sup>, Xiaoyun Li<sup>a,1</sup>, Haiyan Zhang<sup>a</sup>, Heng Wei<sup>a</sup>, Jin Han<sup>a</sup>,  
Guangzhou Xu<sup>a</sup>, Jianlei Chao<sup>b</sup>, Kun Wang<sup>a,\*</sup>, and Tao Jiang<sup>a,\*</sup>

<sup>a</sup> Department of Physical and Chemical Inspection, Center for Disease Control and Prevention of Yancheng, Yancheng, 224003, Jiangsu, China

<sup>b</sup> Department of Environmental Health, Center for Disease Control and Prevention of Yancheng, Yancheng, 224003, Jiangsu, China

<sup>1</sup> These authors contributed equally to this work.

\*Corresponding authors.

E-mail address: 1059452181@qq.com; yccdcjt@163.com (T. Jiang)

ORCID: 0009-0004-0158-3495.

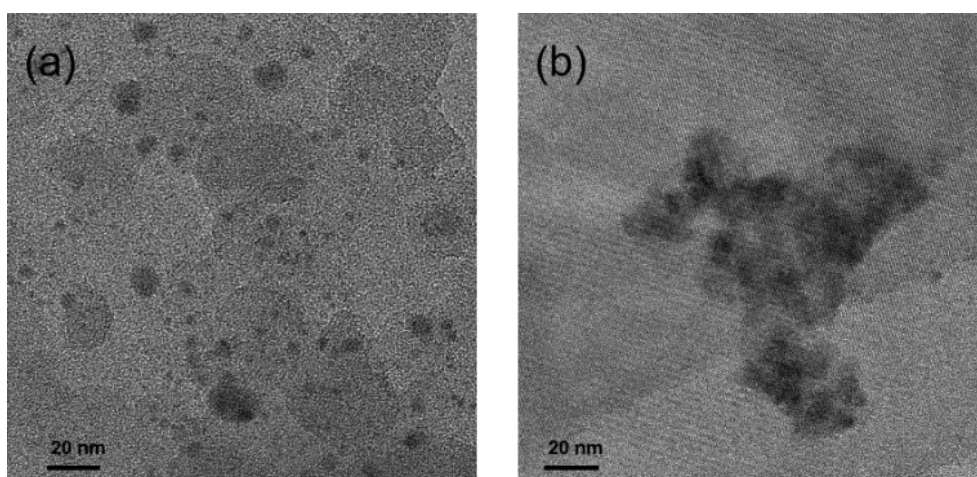

Figure S1. TEM images of (a) 3-MPA-TMB-AgNPs and (b) 3-MPA-TMB-AgNPs incubated with  $\text{Fe}^{2+}$ .

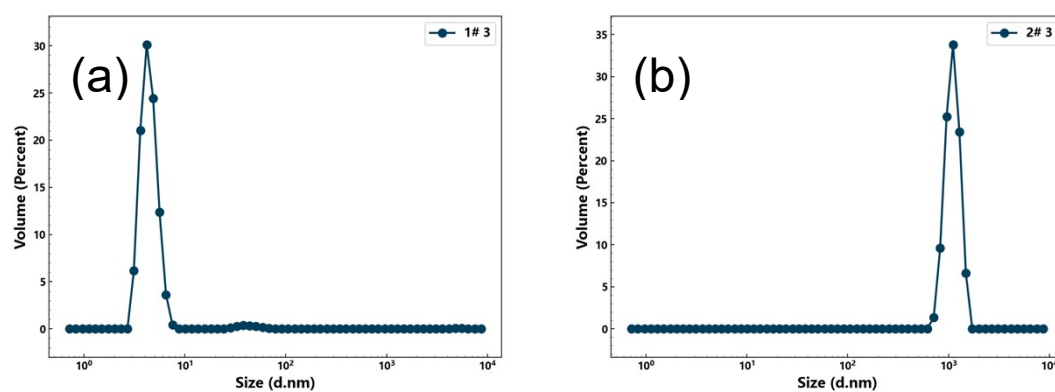

Figure S2. DLS images of (a) 3-MPA-TMB-AgNPs and (b) 3-MPA-TMB-AgNPs incubated with  $\text{Fe}^{2+}$ .

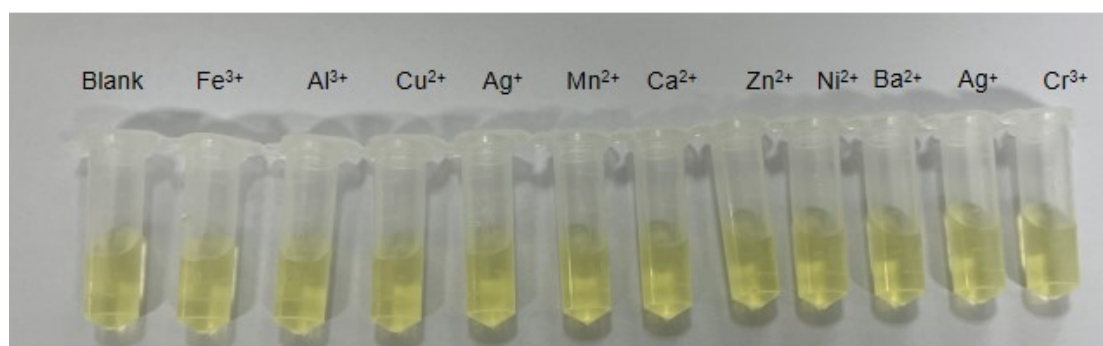

Figure S3. The colorimetric results of various metal ions ( $1.00 \times 10^{-6}$  M) under different pH conditions in lake water.

Table S1. Analytical results for detection of Fe<sup>2+</sup> in tap and lake water sample

| Sample        |   | Backgroud<br>values(μM) | Added<br>(μM) | Detection<br>(μM) | Found<br>(μM) | Average<br>(μM) | Recovery<br>(%) | RSD<br>(%, n =<br>3) |
|---------------|---|-------------------------|---------------|-------------------|---------------|-----------------|-----------------|----------------------|
| Tap<br>water  | 1 | 0.07                    | 0.5           | 0.57              | 0.51          | 0.52            | 104             | 2.21                 |
|               |   |                         |               | 0.60              | 0.53          |                 |                 |                      |
|               |   |                         |               | 2.12              | 2.05          |                 |                 |                      |
|               | 2 |                         | 2             | 2.16              | 2.09          | 2.06            | 103             | 1.28                 |
|               |   |                         |               | 2.11              | 2.04          |                 |                 |                      |
|               |   |                         |               | 10.01             | 9.94          |                 |                 |                      |
|               | 3 |                         | 10            | 10.15             | 10.08         | 10.02           | 100.2           | 0.74                 |
|               |   |                         |               | 10.12             | 10.05         |                 |                 |                      |
|               |   |                         |               | 0.68              | 0.54          |                 |                 |                      |
|               | 1 |                         | 0.5           | 0.73              | 0.55          | 0.55            | 110             | 2.76                 |
|               |   |                         |               | 0.75              | 0.57          |                 |                 |                      |
|               |   |                         |               | 2.26              | 2.08          |                 |                 |                      |
| Lake<br>water | 2 | 0.18                    | 2             | 2.24              | 2.06          | 2.07            | 103.5           | 0.74                 |
|               |   |                         |               | 2.27              | 2.09          |                 |                 |                      |
|               |   |                         |               | 10.21             | 10.03         |                 |                 |                      |
|               | 3 |                         | 10            | 10.47             | 10.29         | 10.23           | 102.3           | 1.74                 |
|               |   |                         |               | 10.55             | 10.37         |                 |                 |                      |
